# Supplementary material for: Quantifying the missing link between forest albedo and productivity in theboreal zone
Source: Copernicus journal article supplement (doi:10.5194/bg-13-6015-2016), 2016-11-03
Supplement: Supplementary file 1 [file bg-13-6015-2016-supplement.zip]

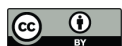

## *Supplement of*

# **Quantifying the missing link between forest albedo and productivity in the boreal zone**

**Aarne Hovi et al.**

*Correspondence to:* Aarne Hovi (aarne.hovi@aalto.fi)

- [bg-13-6015-2016-supplement-title-page.pdf](#)
- [Supplement.xlsx](#)

The copyright of individual parts of the supplement might differ from the CC-BY 3.0 licence.
